# Supplementary material for: Epac1 Is Crucial for Maintenance of Endothelial Barrier Function through A Mechanism Partly Independent of Rac1
Source: PubMed Central journal article supplement (PMC7601253; doi:10.3390/cells9102170), 2020-09-25
Supplement: cells-09-02170-s001.pdf [file cells-09-02170-s001.pdf]

| Rb                  |                     | Alpha              |                    | Cm                  |                     |
|---------------------|---------------------|--------------------|--------------------|---------------------|---------------------|
| Epac1-WT            | Epac1-KO            | Epac1-WT           | Epac1-KO           | Epac1-WT            | Epac1-KO            |
| 0.7225 ±<br>0.02558 | 0.3983 ±<br>0.02132 | 4.110 ±<br>0.05772 | 3.302 ±<br>0.06047 | 0.6475 ±<br>0.04566 | 0.3925 ±<br>0.04459 |

Table S1 Summary of TER modeling. Rb, represents the real barrier function.  $\alpha$ , describes the space between the cells and the matrix. Cm, depicts the membrane capacitance. Data are presented as Mean  $\pm$  SEM. n=4

**(A)**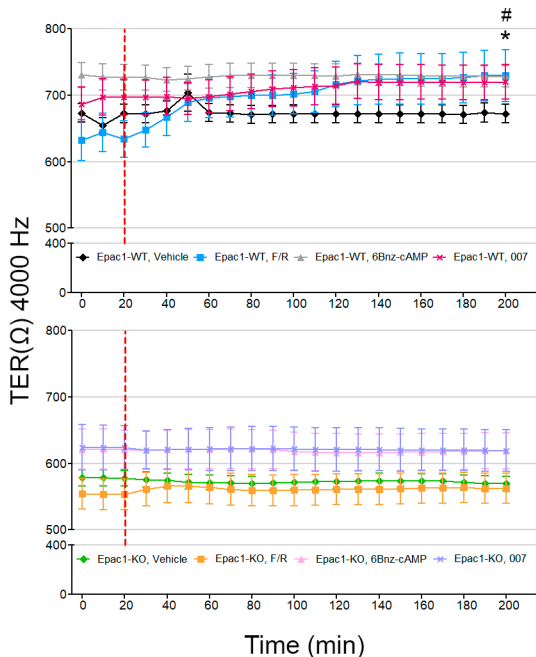

Figure S1 Barrier function over time measured by ECIS. (A) TER in control and treated WT and Epac1-KO cell monolayers. Segmented red line denotes time of analogs application. Data are presented as mean  $\pm$  SEM.  $N = 4-5; n \geq 8$ . “\*” represents significant difference between WT-vehicle and WT-F/R. “#” represents significant difference between WT-vehicle and WT-007.

**(A)**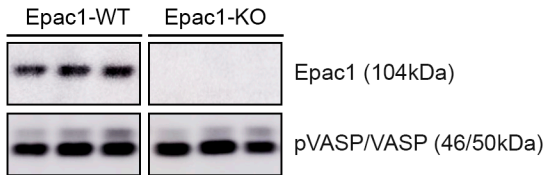

|           | Epac1-WT |   |   | Epac1-KO |   |   |             |
|-----------|----------|---|---|----------|---|---|-------------|
| Vehicle   | +        | - | - | +        | - | - |             |
| 6Bnz-cAMP | -        | + | - | -        | + | - | 100 $\mu$ M |
| 6Bnz-cAMP | -        | - | + | -        | - | + | 200 $\mu$ M |

**(B)**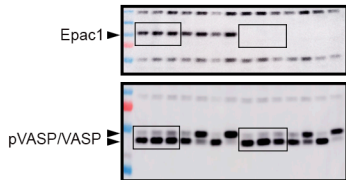

Figure S2 Representative Western blot of pVASP and total VASP from confluent WT and Epac1-KO cell monolayers (A) treated with either vehicle, 100  $\mu$ M or 200  $\mu$ M of 6Bnz-cAMP as indicated. Expression of Epac1 is also shown as internal control, N = 6 (B) Original uncropped gel images depicted in (A), arrowheads indicate bands of interest, black line frames show the bands used for all representative images

**(A)**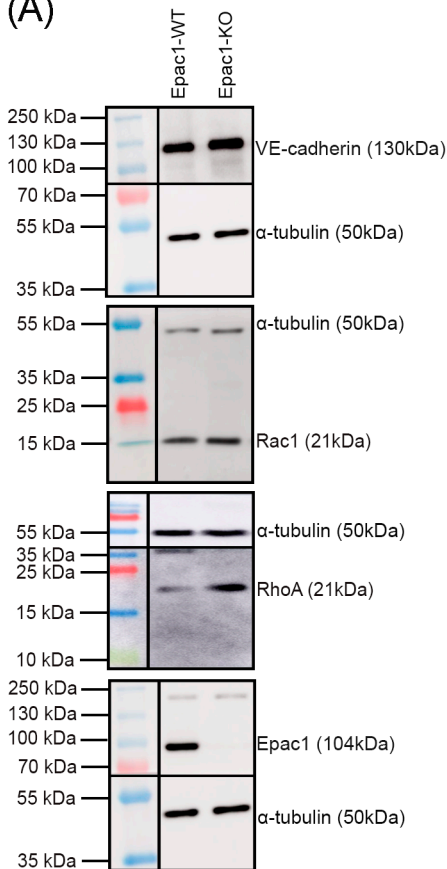**(B)**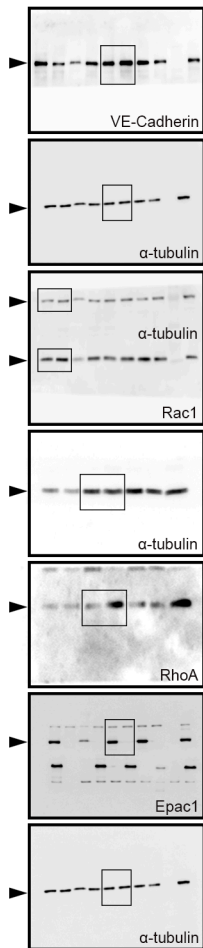

Figure S3 Original Western blot images. (A) Cropped blots presented in Figures 2 and 4 merged with corresponding colorimetric molecular weight marker.

(B) Full-length Western blots from the cropped membranes presented in (A).

Arrowheads indicate bands of interest; black line frames indicate the cut sections.

**(A)**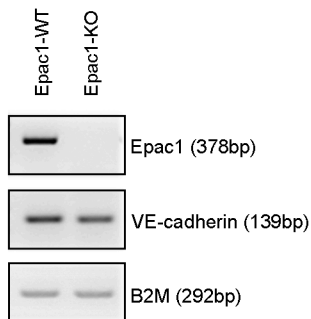**(B)**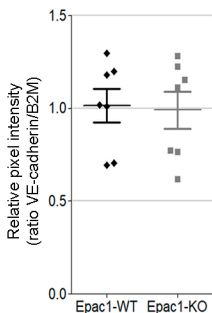**(C)**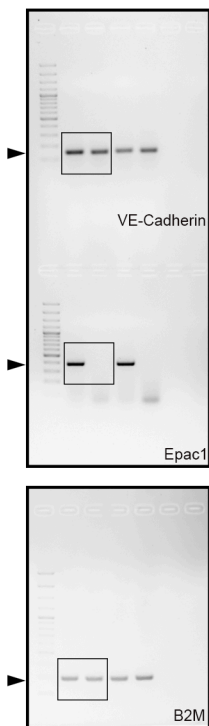

Figure S4 mRNA expression analysis in WT and Epac1-KO cells. (A) Analysis of VE-cadherin mRNA expression by RT-PCR. Lack or presence of Epac1 was confirmed by gene-specific primers. Amplification of B2M was used to verify equal loading;  $n \geq 8$ . (B) Densitometric measurements of the band intensity from obtained amplicons determined the relative mRNA expression of VE-cadherin normalized to B2M. (C) Original uncropped gel images depicted in (A), arrowheads indicate bands of interest, black line frames show the bands used for all representative images;  $n \geq 8$ .

(A)

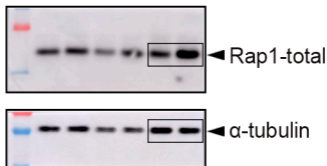

(B)

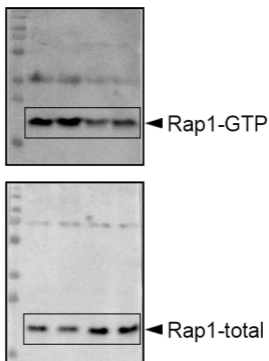

Figure S5 Rap1 protein expression in WT and Epac1-KO cells. (A) Original Western blot images from basal Rap1 and (B) Rap1-GTP pulldown assays presented in Figure 3. Arrowheads indicate bands of interest, black line frames indicate cropped sections.

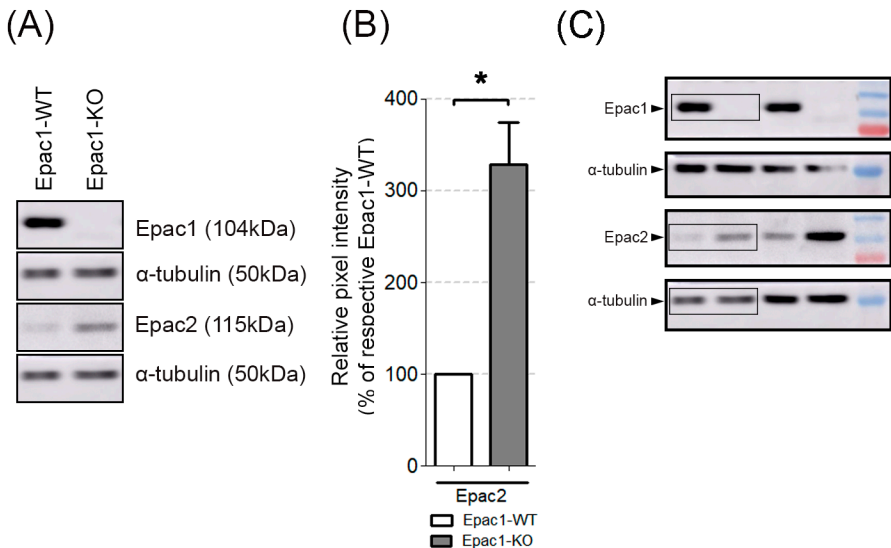

Figure S6 Epac2 expression in WT and Epac1-KO cells. (A) Representative Western blot from Epac1 and Epac2,  $\alpha$ -tubulin was used as loading control. (B) Densitometric measurements from blots presented in (A); N=6 (C) Original Western blot images from (A). Arrowheads indicate bands of interest, black line frames indicate cropped sections.

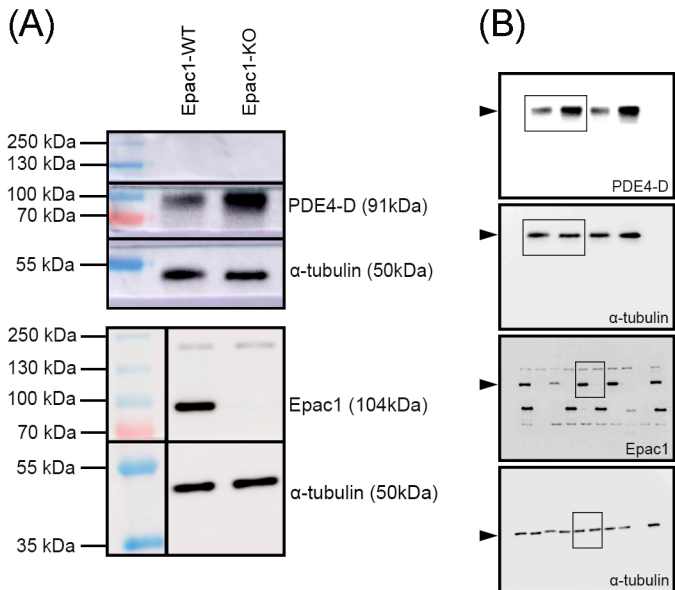

Figure S7 PDE4-D expression in WT and Epac1-KO cells. (A) Cropped Western blot images displayed at Figure 5 merged with corresponding colorimetric molecular weight marker. (B) Full-length Western blots of the cropped membranes presented in (A). Arrowheads indicate bands of interest; black line frames indicate the cut sections.
